# Supplementary material
Source: PubMed Central journal article supplement (PMC4155492)

**Supplementary Fig. S1. Determination of the patient population selected for analysis.** This figure provides an overview of the study cohort with reasons for inclusion/exclusion through the selection process.

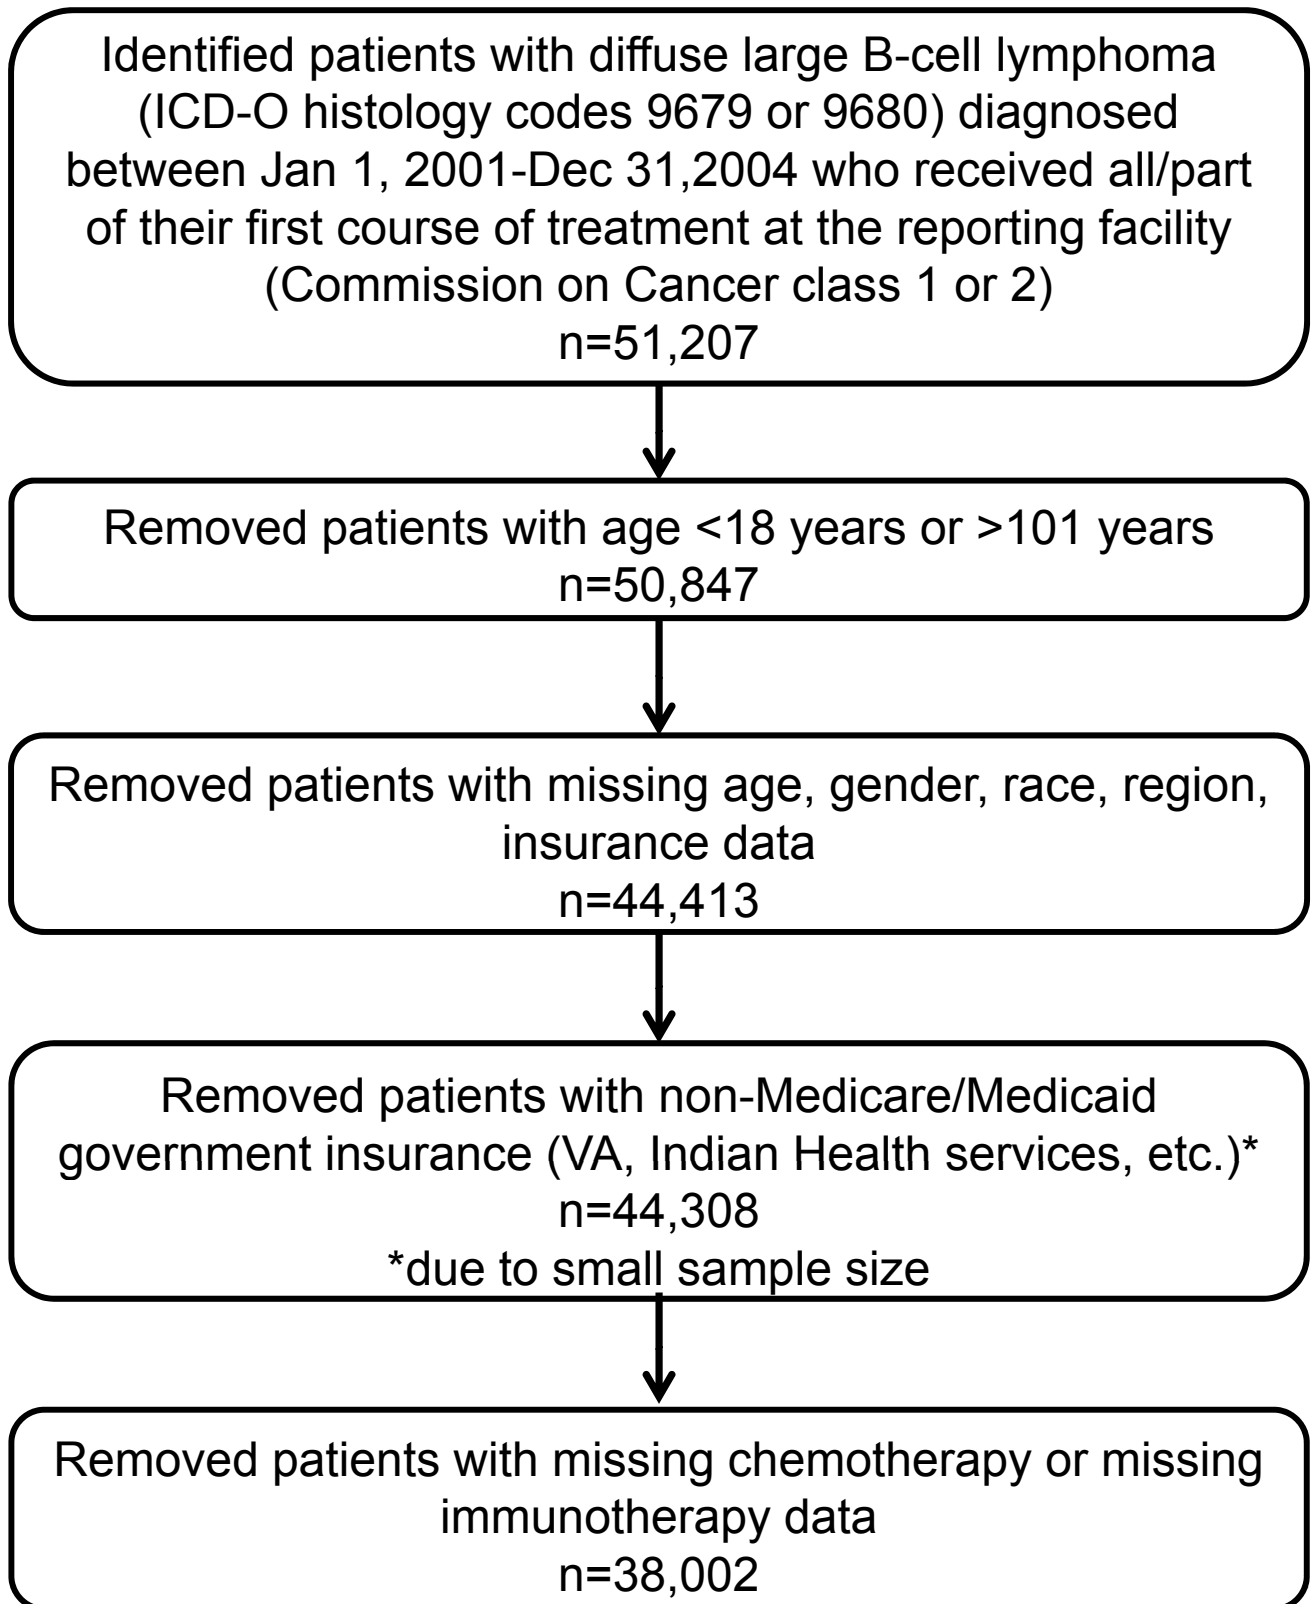

Supplement: NIHMS619443-supplement-Supplemental_Figure.pdf [file NIHMS619443-supplement-Supplemental_Figure.pdf]
